# Supplementary material
Source: PubMed Central journal article supplement (PMC5679470)
Supplement: NIHMS906712-supplement-1.pdf [file NIHMS906712-supplement-1.pdf]

**Full Title:** Non-classical monocytes mediate secondary injury, neurocognitive outcome, and neutrophil infiltration after Traumatic Brain Injury.

**Running Head:** Non classical monocytes in TBI.

**Authors:**

Hadijat M. Makinde., Carla M. Cuda., Talia B. Just., Harris R. Perlman., Steven J. Schwulst.

**Supplementary Figures:**

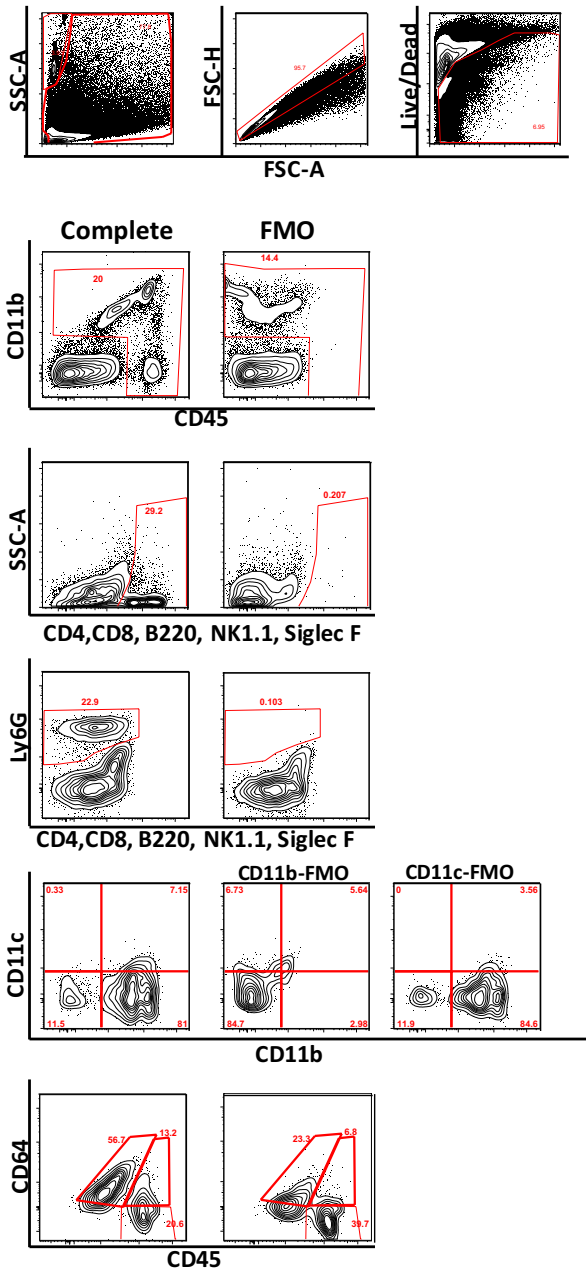

**Figure S1:** Fluorescence minus one analysis of fluorochrome panel: Mice underwent TBI and the brains were harvested and processed as previously described. The single cell suspension was then divided equally and fluorescently labelled with the antibody panel (see Table 1). Each panel had one fluorochrome missing to determine the proper placement of the gates for our flow cytometric analysis.
